# Supplementary material for: Two-step interphase microtubule disassembly aids spindle morphogenesis
Source: PubMed Central journal article supplement (PMC5778756; doi:10.1186/s12915-017-0478-z), 2018-01-23

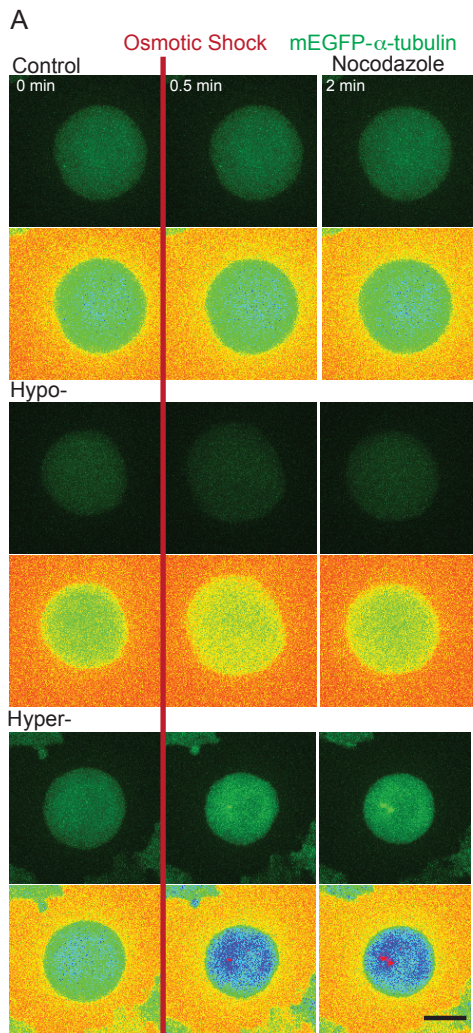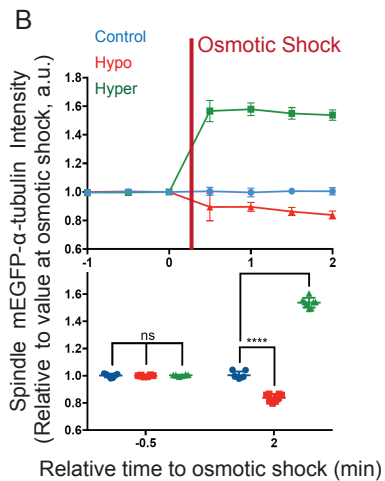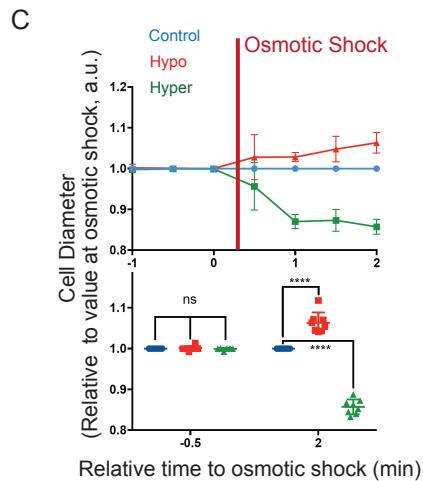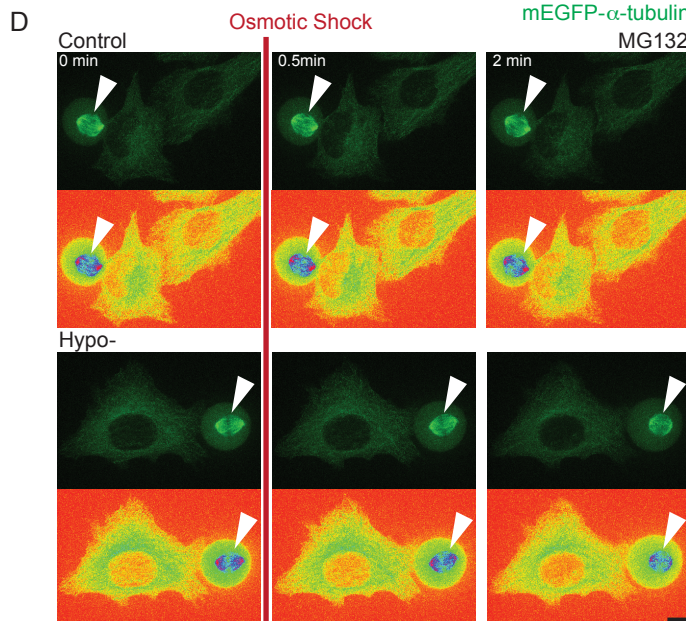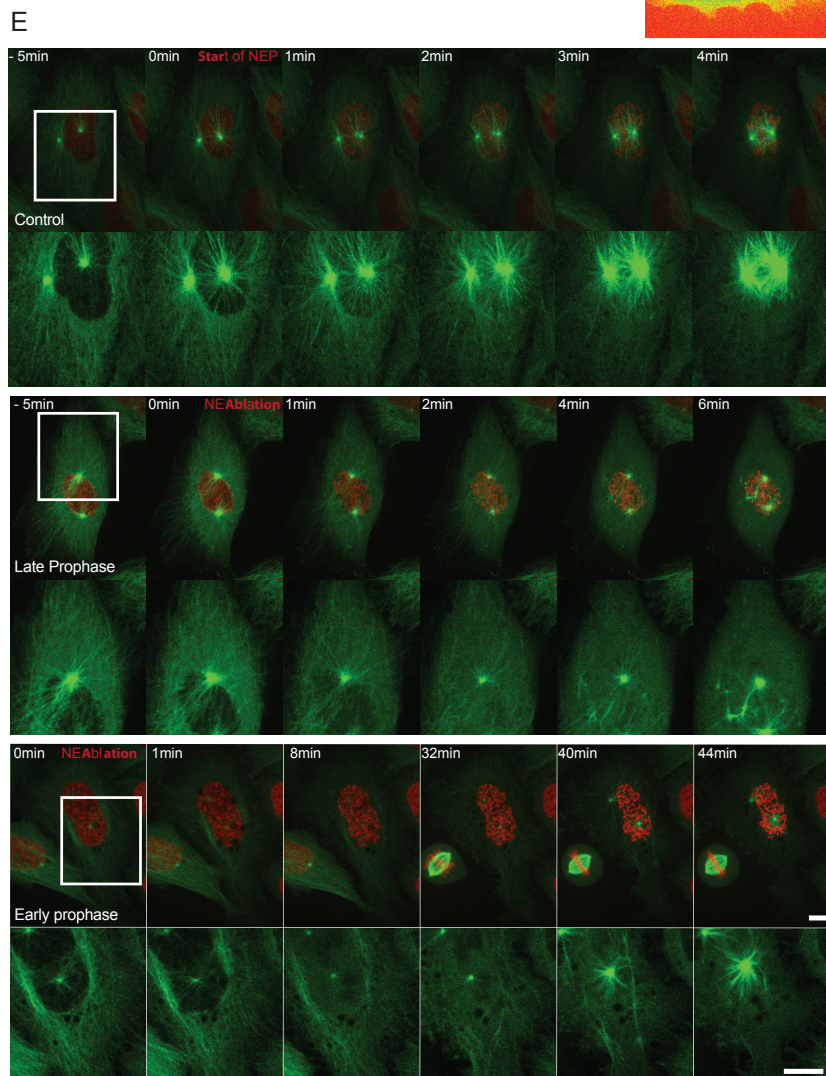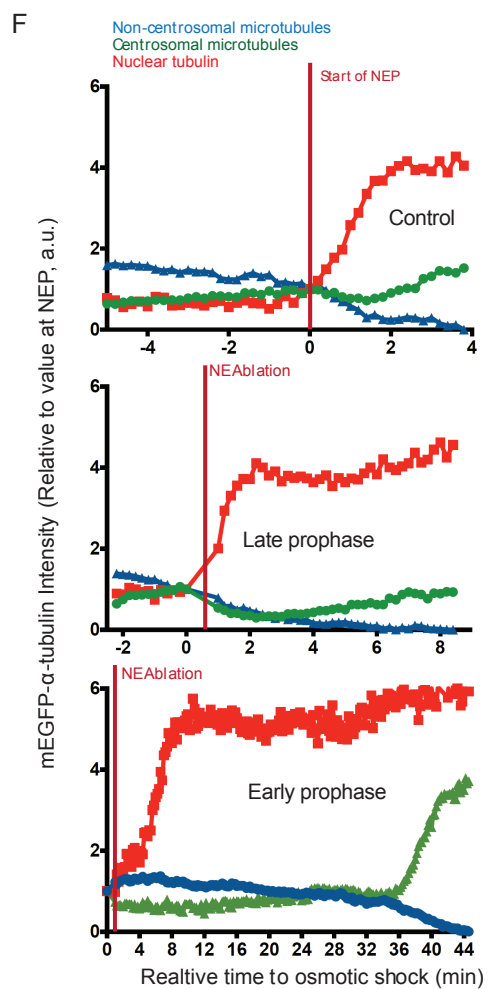

Supplement: 12915_2017_478_MOESM4_ESM.pdf [file 12915_2017_478_MOESM4_ESM.pdf]
